# Effective connectivity inferred from fMRI transition dynamics during movie viewing points to a balanced reconfiguration of cortical interactions

Matthieu Gilson<sup>a,1</sup>, Gustavo Deco<sup>a,b</sup>, Karl Friston<sup>c</sup>, Patric Hagmann<sup>d,e</sup>, Dante Mantini<sup>f,g</sup>, Viviana Betti, Gian Luca Romani<sup>h</sup>, Maurizio Corbetta<sup>i</sup>

<sup>a</sup>*Center for Brain and Cognition, Computational Neuroscience Group, Department of Information and Communication Technologies, Universitat Pompeu Fabra, Roc Boronat 138, Barcelona, 08018, Spain*

<sup>b</sup>*Institució Catalana de la Recerca i Estudis Avançats (ICREA), Universitat Pompeu Fabra, Passeig Lluís Companys 23, Barcelona, 08010, Spain*

<sup>c</sup>*Wellcome Trust Centre for Neuroimaging, Institute of Neurology, University College London, 12 Queen Square, London WC1N 3BG, United Kingdom*

<sup>d</sup>*Department of Radiology, Lausanne University Hospital and University of Lausanne (CHUV-UNIL), Rue du Bugnon 46, 1011 Lausanne, Switzerland*

<sup>e</sup>*Signal Processing Lab 5, École Polytechnique Fédérale de Lausanne (EPFL), Station 11, 1015 Lausanne, Switzerland*

<sup>f</sup>*Research Center for Motor Control and Neuroplasticity, KU Leuven, 101 Tervuursevest, 3001 Leuven, Belgium*

<sup>g</sup>*Department of Health Sciences and Technology, ETH Zurich, Winterthurerstrasse 190, 8057 Zurich, Switzerland*

<sup>h</sup>*Institute of Advanced Biomedical Technologies - G. d'Annunzio University Foundation, Department of Neuroscience Imaging and Clinical Science, G. d'Annunzio University, Via dei Vestini 31, Chieti, 66013, Italy*

<sup>i</sup>*Departments of Neurology, Radiology, Anatomy of Neurobiology, School of Medicine, Washington University, St. Louis, St Louis, USA*

---

## Abstract

Our behavior entails a flexible and context-sensitive interplay between brain areas to integrate information according to goal-directed requirements. However, the neural mechanisms governing the entrainment of functionally specialized brain areas remain poorly understood. In particular, the question arises whether observed changes in the regional activity for different cognitive conditions are explained by modifications of the inputs or recurrent connectivity? We observe that fMRI transitions over successive time points convey information about the task performed by 19 subjects, namely watching a movie as opposed

---

<sup>1</sup>Corresponding author: [matthieu.gilson@upf.edu](mailto:matthieu.gilson@upf.edu); Universitat Pompeu Fabra, C/ Ramon de Trias Fargas, 25-27, 08005 Barcelona, Spain

to a black screen (rest). We use a theoretical framework that decomposes this spatiotemporal functional connectivity pattern into local variability received by the 66 cortical regions and recurrent effective connectivity between them. We find that, among the estimated model parameters, movie viewing affects to a larger extent the local excitabilities, which we interpret as extrinsic changes related to the increased stimulus load. However, detailed changes in the effective connectivity preserve a balance in the propagating activity and select specific pathways so as to integrate visual and auditory information to high-level brain regions and across the two brain hemispheres. These findings speak to a dynamic coordination underlying the functional integration in the brain.

---

## 1. Introduction

The brain comprises a large number of functionally distinct areas in which information and computational processes are both segregated and integrated [1, 2]. A fundamental question in system neuroscience is how information can  
5 be processed in a distributed fashion by the neuronal architecture. Brain regions exhibit a high degree of functional diversity, with a massive number of connections that coordinate their activity. Accordingly, empirical evidence from functional magnetic resonance imaging (fMRI), electro-encephalography (EEG), magneto-encephalography (MEG) in humans, as well as cell recordings in ani-  
10 mals, supports the notion that brain functions involve multiple brain areas [3]. Long-range synchronization of brain activity has been proposed as a dynamical mechanism for mediating the interactions between distant neuronal populations at the cellular level [4, 5], as well as within large-scale cortical subnetworks both at rest [6, 7, 8, 9] and when performing a task [10, 11].

15 Depending on the task, cortical dynamics reshape the global pattern of correlated activity observed using neuroimaging - denoted by functional connectivity (FC) [9, 12]. Presumably, both sensory-driven and cognitive-driven processes are involved in shaping FC from its resting state [13, 14]. Recently, the temporal aspect of fMRI signals has been much studied - in relation to tasks performed

20 by subjects or their behavioral conditions - via the concept of ‘dynamic FC’  
that evaluates the fluctuations of fMRI correlation patterns over time [15], the  
fractal aspect of fMRI time series [16, 17] or transitions in fMRI activity across  
successive TRs [18]. The present study builds upon a recently developed whole-  
cortex dynamic model [19], which extract this functionally relevant information  
25 via the BOLD covariances evaluated with and without time shifts, which relates  
to BOLD transition statistics.

The proposed modeling allows us to examine the respective roles played by  
the local variability of each brain area and long-range neuro-anatomical projec-  
tions between them in shaping the cortical communication, which results in the  
30 measured FC. We rely on the well-established hypothesis that both the activity  
and coordination of different regions depend on both the local activity and in-  
tracortical connectivity [20]. Based on dynamic models for blood oxygen level  
dependent (BOLD) activity at the level of a cortical region, techniques have  
been developed to estimate the connectivity strengths: the notion of ‘effective  
35 connectivity’ (EC) describes causal pairwise interactions at the network level  
[21, 22, 23, 24]. The distinction between functional and effective connectivities is  
crucial here: FC is defined as the statistical dependence between distant neuro-  
physiological activities, whereas EC is defined as the influence one neural system  
exerts over another [25]. In the present study, the definition of EC is actually  
40 close to its original formulation in neurophysiology [26]: estimated weights in a  
circuit diagram that replicate observed patterns of functional connectivity. Im-  
portantly, the network effective connectivity is inferred for individual links here  
(1180 connections between 66 cortical regions) and thus form a directed graph,  
contrasting with previous studies that directly use structural connectomes as  
45 “equivalent EC” [27, 28, 29].

After describing the changes observed in empirical FC between subjects at  
rest and watching a movie, we examine whether these FC alterations are well  
captured by the proposed model. Considering the network parameter estimates  
as fingerprints of the brain dynamics, we seek a mechanistic explanation for the  
50 observed FC changes by disentangling significant changes in local variability and

in intracortical connectivity.

## 2. Material and Methods

### 2.1. Study design for empirical fMRI data during rest and passive movie viewing

As detailed in our previous papers [30, 31], 24 right-handed young, healthy  
 55 volunteers (15 females, 20-31 years old) participated in the study. They were  
 informed about the experimental procedures, which were approved by the Ethics  
 Committee of the Chieti University, and signed a written informed consent.  
 Only 22 participants had recordings for both a resting state with eyes opened  
 and a natural viewing condition; 2 subjects with only recording at rest were  
 60 discarded. In the resting state, participants fixated a red target with a diameter  
 of 0.3 visual degrees on a black screen. In the natural viewing condition, subjects  
 watched and listened to 30 minutes of the movie ‘The Good, the Bad and the  
 Ugly’ in a window of  $24 \times 10.2$  visual degrees. Visual stimuli were projected on  
 a translucent screen using an LCD projector, and viewed by the participants  
 65 through a mirror tilted by 45 degrees. Auditory stimuli were delivered using  
 MR-compatible headphones.

### 2.2. Data acquisition

Functional imaging was performed with a 3T MR scanner (Achieva; Philips  
 Medical Systems, Best, The Netherlands) at the Institute for Advanced Biomed-  
 70 ical Technologies in Chieti, Italy. The functional images were obtained us-  
 ing T2\*-weighted echo-planar images (EPI) with BOLD contrast using SENSE  
 imaging. EPIs comprised of 32 axial slices acquired in ascending order and  
 covering the entire brain ( $230 \times 230$  in-plane matrix,  $TR/TE=2$  s/ $3.5$  s, flip  
 angle =  $90^\circ$ , voxel size= $2.875 \times 2.875 \times 3.5$  mm<sup>3</sup>). For each subject, 2 and 3  
 75 scanning runs of 10 minutes duration were acquired for resting state and nat-  
 ural viewing, respectively. Only the first 2 movie scans are used here, to have  
 the same number of time points for the two conditions (i.e., 20 minutes each).  
 Each run included 5 dummy volumes - allowing the MRI signal to reach steady

state and an additional 300 functional volumes that were used for analysis. Eye  
 80 position was monitored during scanning using a pupil-corneal reection system  
 at 120 Hz (Iscan, Burlington, MA, USA). A three-dimensional high-resolution  
 T1-weighted image, for anatomical reference, was acquired using an MP-RAGE  
 sequence (TR/TE=8.1 s/3.7 s, voxel size= $0.938 \times 0.938 \times 1 \text{ mm}^3$ ) at the end of  
 the scanning session.

### 85 2.3. Data processing

Data were preprocessed using SPM8 (Wellcome Department of Cognitive  
 Neurology, London, UK) running under MATLAB (The Mathworks, Natick,  
 MA). The preprocessing steps involved: (1) correction for slice-timing differences  
 (2) correction of head-motion across functional images, (3) coregistration of the  
 90 anatomical image and the mean functional image, and (4) spatial normalization  
 of all images to a standard stereotaxic space (Montreal Neurological Institute,  
 MNI) with a voxel size of  $3 \times 3 \times 3 \text{ mm}^3$ . The mean frame wise displacement [32]  
 was measured from the fMRI data to estimate head movements. They do not  
 show any significant difference across the rest and movie recordings ( $p > 0.4$ ).  
 95 Furthermore, the BOLD time series in MNI space were subjected to spatial  
 independent component analysis (ICA) for the identification and removal of  
 artifacts related to blood pulsation, head movement and instrumental spikes  
 [33]. This BOLD artifact removal procedure was performed by means of the  
 GIFT toolbox (Medical Image Analysis Lab, University of New Mexico). No  
 100 global signal regression or spatial smoothing was applied. For each recording  
 session (subject and run), we extracted the mean BOLD time series from the  
 $N = 66$  regions of interest (ROIs) of the brain atlas used in [34]; see Table 1 for  
 the complete list.

### 2.4. Structural connectivity

105 Anatomical connectivity was estimated from Diffusion Spectrum Imaging  
 (DSI) data collected in five healthy right-handed male participants [34, 23].  
 The gray matter was first parcellated into the  $N = 66$  ROIs, using the same

| Group | ROI abbreviation | Brain region                         | ROI index |
|-------|------------------|--------------------------------------|-----------|
| VIS   | CUN              | Cuneus                               | 29, 38    |
|       | PCAL             | Pericalcarine cortex                 | 28, 39    |
|       | LING             | Lingual gyrus                        | 27, 40    |
|       | LOCC             | Lateral occipital cortex             | 7, 60     |
| AUD   | ST               | Superior temporal cortex             | 14, 53    |
|       | TT               | Transverse temporal cortex           | 6, 61     |
|       | IT               | Inferior temporal cortex             | 9, 58     |
|       | MT               | Middle temporal cortex               | 13, 54    |
| INT   | FUS              | Fusiform gyrus                       | 5, 62     |
|       | SP               | Superior parietal cortex             | 8, 59     |
|       | IP               | Inferior parietal cortex             | 10, 57    |
|       | TP               | Temporal pole                        | 3, 64     |
|       | SMAR             | Supramarginal gyrus                  | 11, 56    |
|       | BSTS             | Bank of the superior temporal sulcus | 12, 55    |
| SMT   | PREC             | Precentral gyrus                     | 16, 51    |
|       | PSTC             | Postcentral gyrus                    | 15, 52    |
|       | PARC             | Paracentral lobule                   | 30, 37    |
| FRNT  | FP               | Frontal pole                         | 4, 63     |
|       | CMF              | Caudal middle frontal cortex         | 17, 50    |
|       | RMF              | Rostral middle frontal cortex        | 20, 47    |
|       | PTRI             | Pars triangularis                    | 19, 48    |
|       | PORB             | Pars orbitalis                       | 21, 46    |
|       | POPE             | Pars opercularis                     | 18, 49    |
|       | SF               | Superior frontal cortex              | 25, 42    |
|       | LOF              | Lateral orbitofrontal cortex         | 22, 45    |
|       | MOF              | Medial orbitofrontal cortex          | 26, 41    |
| CTRL  | ENT              | Entorhinal cortex                    | 1, 66     |
|       | PARH             | Parahippocampal cortex               | 2, 65     |
|       | CAC              | Caudal anterior cingulate cortex     | 23, 44    |
|       | RAC              | Rostral anterior cingulate cortex    | 24, 43    |
|       | PC               | Posterior cingulate cortex           | 33, 34    |
|       | ISTC             | Isthmus of the cingulate cortex      | 31, 36    |
|       | PCUN             | Precuneus                            | 32, 35    |

Table 1: Table of ROIs with abbreviations, names and indices. The left column indicates ensembles used later for illustration purpose, grouping ROIs into visual, auditory, so-called ‘integration’, sensory-motor, frontal and ‘central’ areas.

low-resolution atlas used for the FC analysis. For each subject, we performed white matter tractography between pairs of cortical areas to estimate a neuro-  
 110 anatomical connectivity matrix. In our method, the DSI values are only used to determine the skeleton: a binary matrix of structural connectivity (SC) obtained by averaging the matrices over subjects and applying a threshold for the existence of connections. The strengths of individual intracortical connections do not come from DSI values, but are optimized as explained below. It  
 115 is known that DSI underestimates inter-hemispheric connections [34]. Homotopic connections between mirrored left and right ROIs are important in order to model whole-cortex BOLD activity [29]. Here we add all such possible homotopic connections, which are tuned during the optimization as other existing connections. This slightly increases the density of structural connectivity (SC)  
 120 from 27% to 28%.

## 2.5. Empirical functional connectivity

For each of the two sessions of 10 minutes of rest and movie, the BOLD time series is denoted by  $s_i^t$  for each region  $1 \leq i \leq N$  with time indexed by  $1 \leq t \leq T$  ( $T = 300$  time points separated by a TR=2 seconds). We denote  
 125 by  $\bar{s}_i$  the mean signal:  $\bar{s}_i = \frac{1}{T} \sum_t s_i^t$  for all  $i$ . Following [19], the empirical FC corresponds to covariances calculated as:

$$\begin{aligned}\hat{Q}_{ij}^0 &= \frac{1}{T-2} \sum_{1 \leq t \leq T-1} (s_i^t - \bar{s}_i)(s_j^t - \bar{s}_j) , \\ \hat{Q}_{ij}^1 &= \frac{1}{T-2} \sum_{1 \leq t \leq T-1} (s_i^t - \bar{s}_i)(s_j^{t+1} - \bar{s}_j)\end{aligned}\tag{1}$$

For each individual and session, we calculate the time constant  $\tau_x$  associated with the exponential decay of the autocovariance averaged over all ROIs:

$$\tau_x = \frac{1}{N} \sum_{1 \leq i \leq N} \frac{1}{\log(\hat{Q}_{ii}^0) - \log(\hat{Q}_{ii}^1)}\tag{2}$$

This is used to “calibrate” the model, before its optimization. Similar calculations are done for 2 TR.

## 2.6. Model of cortical dynamics

130 The model uses two sets of parameters to generate the spatiotemporal FC:

- the local variability embodied in the matrix  $\Sigma$  inputed individually to each of the  $N = 66$  ROIs (see Table 1 for the complete list) or jointly to ROI pairs (only for bilateral CUN, PCAL, ST and TT);
- the network effective connectivity between these ROIs embodied by the  
135 matrix  $C$ , whose skeleton is determined by DTI (see details for structural connectivity above).

The rationale behind the use of spatially cross-correlated inputs (off-diagonal elements of  $\Sigma$ ) in the model is to take into account for common sensory inputs to homotopic visual and auditory ROIs. Ideally, the model should be extended to  
140 incorporate subcortical areas and the existence of input cross-correlations inputs should be evaluated for all ROI pairs. However, this level of details is out of the scope of the present work and we constrain such input cross-correlations to 4 pairs of ROIs. Another point concerns the use of individual EC skeletons or refinements of SC using graph theory for individual groups [35], but we leave  
145 this for later work.

Formally, the network model is a multivariate Ornstein-Uhlenbeck process, where the activity variable  $x_i$  of node  $i$  decays exponentially with time constant  $\tau_x$  - estimated using Eq. (2) - and evolves depending on the activity of other populations:  $dx_i = \left(\frac{-x_i}{\tau_x} + \sum_{j \neq i} C_{ij}x_j\right)dt + dB_i$ . Here,  $dB_i$  is spatially colored  
150 noise with covariance matrix  $\Sigma$ , with the variances of the random fluctuations on the diagonal and cross-correlated inputs corresponding to off-diagonal elements for CUN, PCAL, ST and TT (see Table 1). In the model, all variables  $x_i$  have zero mean and their spatiotemporal covariances  $Q_{ij}^\tau$ , where  $\tau$  indicates time shift, can be calculated by solving the Lyapunov equation:  $JQ^0 + Q^0J^\dagger +$   
155  $\Sigma = 0$  for  $\tau = 0$ ; and then  $Q^\tau = Q^0 \expm(J^\dagger \tau)$  for  $\tau > 0$ . Here  $J$  is the Jacobian of the dynamical system and depends on the time constant  $\tau_x$  and the network effective connectivity:  $J_{ij} = \frac{-\delta_{ij}}{\tau_x} + C_{ij}$ , where  $\delta_{ij}$  is the Kronecker delta



and the superscript  $\dagger$  denotes the matrix transpose;  $\expm$  denotes the matrix exponential. In practice, we use two time shifts:  $\tau = 0$  on the one hand and  
 160 either  $\tau = 1$  or 2 TR on the other hand, as this is sufficient to characterize the network parameters.

## 2.7. Parameter estimation procedure

We tune the model such that its covariance matrices  $Q^0$  and  $Q^\tau$  reproduce the empirical FC, namely  $\hat{Q}^0$  and  $\hat{Q}^\tau$ , with  $\tau$  being either 1 or 2 TR.  
 165 The uniqueness of this estimation follows from the bijective mapping from the model parameters  $C$  and  $\Sigma$  to the FC pair (FC0,FC1). Despite the estimation of input cross-correlation, the essential steps are similar to the iterative optimization procedure described previously [19] to tune the network parameters  $C$  and  $\Sigma$ . At each step, the Jacobian  $J$  is calculated from the current value  
 170 of  $C$ . Then, the model FC matrices  $Q^0$  and  $Q^\tau$  are calculated from the consistency equations, using the Bartels-Stewart algorithm to solve the Lyapunov equation. The difference matrices  $\Delta Q^0 = \hat{Q}^0 - Q^0$  and  $\Delta Q^\tau = \hat{Q}^\tau - Q^\tau$  determine the model error  $E = \sum_{i,j} (\Delta Q^0)^2 + \sum_{i,j} (\Delta Q^\tau)^2$ , which is the matrix distance between the model and the data observables. The desired Jacobian  
 175 update is the matrix  $\Delta J^\dagger = (Q^0)^{-1} [\Delta Q^0 + \Delta Q^\tau \expm(J^\dagger \tau)]$ , which decreases the model error  $E$  at each optimization step, similar to a gradient descent. The best fit corresponds to the minimum of  $E$ . Finally, the connectivity update is  $\Delta C_{ij} = \eta_C \Delta J_{ij}$  for existing connections only; other weights are forced at 0. We also impose non-negativity for the EC values during the optimization. To  
 180 take properly the effect of cross-correlated inputs into account, we adjust the  $\Sigma$  update from the heuristic update in [19]:  $\Delta \Sigma = -\eta_\Sigma (J \Delta Q^0 + \Delta Q^0 J^\dagger)$ . As with weights for non-existing connections,  $\Sigma$  elements distinct from the diagonal and cross-correlated inputs are kept equal to 0 at all times. In numerical simulations, we use  $\eta_C = 0.0005$  and  $\eta_\Sigma = 0.05$ .

185 To verify the robustness of the optimization with respect to the choice for ROIs with (spatially) cross-correlated inputs, we compared the tuned models with input cross-correlation for 1) CUN, PCAL, ST and TT; 2) CUN, PCAL,

LING, LOCC, ST, TT and MT; 3) none. Although detailed estimates differ, the results presented in this paper are qualitatively observed for all three models.

190 In practice, the model compensates the absence of input cross-correlations by overestimating the connections between the corresponding ROIs. For simplicity, we only consider such inputs for putative primary sensory ROIs involved in the task here.

The optimization code is available with the empirical data on [github.com/MatthieuGilson/EC\\_estimation](https://github.com/MatthieuGilson/EC_estimation). The discarded subjects in the present study  
195 are 1, 11 and 19, among the 22 subjects available (numbered from 0 to 21).

## 2.8. Normalized statistical scores and effective drive (ED)

We define the following z-scores for  $X$  being  $C$  or  $\Sigma$  with respect to the whole distribution over all connections/ROIs and subjects as

$$\text{score}(X_{ij}) = \frac{\text{mean}(X_{ij}) - l_X}{\text{std}(X_{ij})} , \quad (3)$$

where mean and std correspond to the mean and standard deviation over subjects for the considered matrix element, while  $l_X$  is the median of all relevant non-zero elements of  $C$  or  $\Sigma$ , as illustrated by the dashed-dotted line in Fig. 5A. We also define the effective drive as

$$\text{ED}_{ij} = \text{score}(C_{ij})\sqrt{Q_{jj}^0} , \quad (4)$$

with the corresponding median  $l_{\text{ED}}$ . It measures how the fluctuating activity at region  $j$  with amplitude corresponding to the standard deviation  $\sqrt{Q_{jj}^0}$   
200 propagates to region  $i$ .

## 2.9. Louvain community detection method

We identify communities in networks based on the modularity of a partition of the network [36]. The modularity measures the excess of connections between ROIs compared to the expected values estimated from the sum of incoming  
205 and outgoing weights for the nodes (targets and sources, respectively). The Louvain method [37] iteratively aggregates ROIs to maximize the modularity of

a partition of the ROIs in community. Designed for large networks, it performs a stochastic optimization, so we repeat the detection 10 times for each subject in practice and calculate the average participation index - in the same community -  
 210 for each pair of ROIs over the subjects and 10 trials for each of the two conditions (rest and movie).

To test the significance of the differences between the estimated communities of each condition, we generate 1000 surrogate communities where the conditions are chosen randomly with equal chance for each subject. This gives a null  
 215 distribution of 1000 participation indices for each pair of ROIs, whose upper 5% tail is used to determine significance.

### 3. Results

#### 3.1. Changes in spatiotemporal FC between rest and movie viewing

We re-analyzed BOLD imaging data already reported recorded in 22 healthy  
 220 volunteers when watching either a black screen - referred to as rest - or a movie (2 sessions of 10 minutes for each condition). Here these signals are aggregated according to a parcellation of  $N = 66$  cortical regions, or regions of interest (ROIs), listed in Table 1. Firstly, we examine the changes in BOLD statistics up to the second-order between the two conditions, since these functional  
 225 observables are typically used to tune whole-brain dynamic models: BOLD correlations [27, 28, 29] and time-shifted covariances [19]. Doing so, we address the question of which statistics of the BOLD time series discriminate between the two behavioral conditions. As shown in Fig. 1A, the BOLD signals do not exhibit consistent changes in their means (circles) between rest and movie at the  
 230 subject level. In contrast, the BOLD variances (squares) increase by about 50% on average when watching the movie; the black lines indicate a perfect match. The right panel of Fig. 1A displays time constants  $\tau_x$  (triangles) estimated from BOLD autocovariance functions. They indicate the “memory depth” of the corresponding time series, quantifying how much the BOLD activity at a given  
 235 TR influences the successive TRs; see Eq. (2) in Methods. Here no significant

change of temporal statistics, unlike reduction of long-range temporal correlations measured by the Hurst exponent [16]. From the plots in Fig. 1A, we discard three individuals (in red) with extreme values: two for the variances (excessive variance for movie) and one for  $\tau_x$  (small values for both conditions).

240 From the original 22 subjects, this leaves 19 for the following analysis.

Now considering ROIs individually and the variability of the BOLD means and variances over the subjects in Fig. 1B, we observe as before significant changes only for the variances in some ROIs (blue crosses). Considering BOLD covariances for pairs of ROIs, we calculate for each matrix element the significance for each matrix element using Welch’s t-test: both FC0 with zero time shift and FC1 with a shift of 1 TR are displayed in Fig. 1C; see Eq. (1) in Methods for a formal definition of FC. As a comparison, we also show the BOLD correlations in Fig. 1D: distinct matrix elements appear to be the most significant, but the comparison of the corresponding p-value distributions in Fig. 1E shows that variances (in cyan) discriminate between between rest and movie, followed by correlations (black), then FC0 (dark blue) and finally FC1 (green).

### 3.2. *The noise-diffusion network model captures well the changes in spatiotemporal FC across conditions*

In order to make sense of the collective changes observed in the spatiotemporal FC and move beyond a phenomenological description, the present studies 255 draws upon our recent modeling study for resting-state fMRI data [19]. The dynamic network model aims to reproduce the empirical BOLD covariances, both with and without time shift. This generative model is schematically represented in Fig. 2 with only a few cortical regions in the diagrams, while the matrices involve all  $N = 66$  ROIs that cover the whole cortex. Fig. 2A shows 260 the structural connectivity (SC), which is determined by DSI data, measuring the density of white-matter fibers between the ROIs; gray pixels indicate homotopic connections that are added post-hoc, as explained in Methods. The model comprises two sets of parameters: local variability corresponding to the input covariance matrix  $\Sigma$  (purple noisy inputs in Fig. 2B) and recurrent ef-

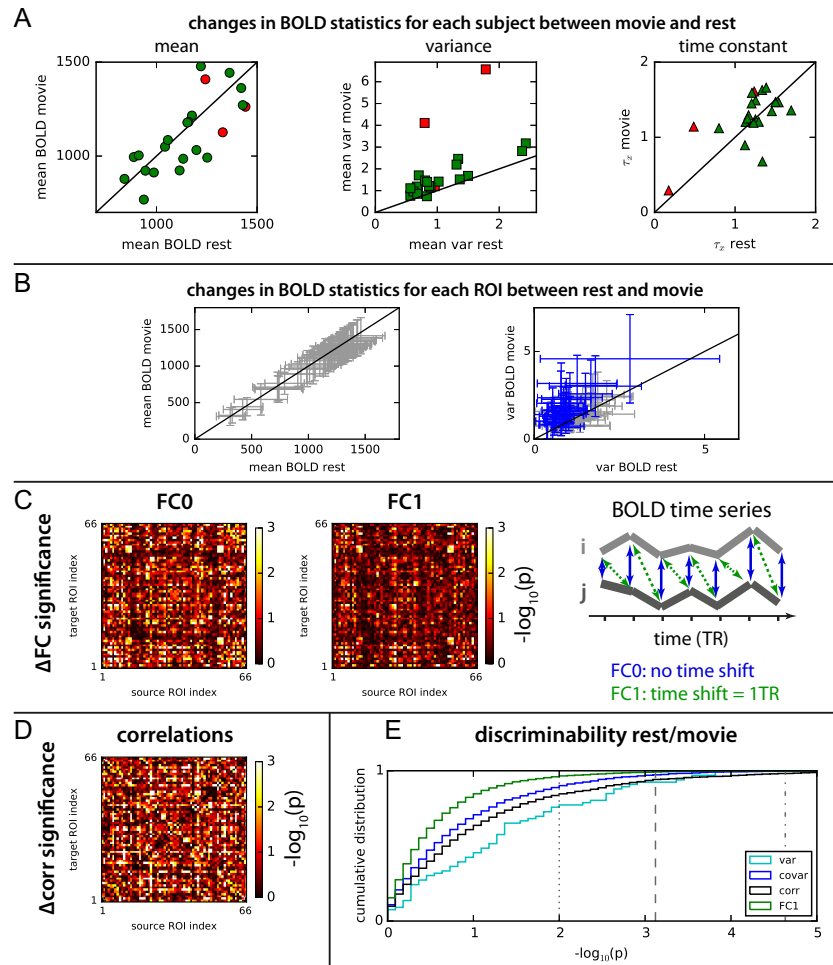

Figure 1: **fMRI data recorded on subjects watching a black screen (rest) or a movie.** **A:** Comparison of BOLD means, variances and time constants  $\tau_x$  between the two conditions: rest and movie. Each symbol represents a subject and red symbols indicate the three discarded subjects, leaving 19 valid subjects for the following analysis. The black lines indicate identical values for rest and movie. **B:** Changes in BOLD mean and variance between rest and movie conditions. Each cross represents one of the  $N = 66$  cortical ROIs and the variability corresponds to the distribution over all 22 subjects. For the variances, blue crosses indicate significant changes between rest and movie (with p-value  $p < 0.01$ ). **C:** Significant changes in covariances matrices, FC0 with no time shift and FC1 with a time shift equal to 1 TR. The plotted score are  $-\log_{10}(p)$  as in C. **D:** Same as D for BOLD correlations instead of covariances. **E:** Comparison of cumulative distribution of p-values for variances (diagonal of FC0 in cyan), covariances (off-diagonal elements of FC0 in blue), correlations (black) and FC1 values (green). The vertical dotted line indicates the significance threshold for  $p < 0.01$  (uncorrected), while the Bonferroni family-wise error rate 0.05 is indicated by the dashed line for  $N$  parameters (variances) and the dashed-dotted line for  $N(N+1)/2 = 2211$  parameters (covariances).

fective connectivity (EC) between ROIs (matrix  $C$  with directional connections represented by the uneven red arrows). The skeleton of EC is determined by SC, assuming the existence of connections in both directions; the weights for absent connections are always zero. Here we include input cross-correlations for  
270 homotopic regions (anti-diagonal of  $\Sigma$ ) in the visual and auditory ROIs: CUN, PCAL, ST and TT (see Table 1). The rationale is to account for binocular visual and binaural inputs related to the movie stimulus, whose corresponding strengths are estimated as other parameters. The fluctuating activity of each ROI due to the input covariance  $\Sigma$  is shaped by the recurrent EC to generate  
275 the network pattern of correlated activity. The latter is measured by the pair of covariance matrices FC0 and FC1 (see Fig. 2C).

The parameters for existing connections in  $C$  and input (co)variances in  $\Sigma$  are optimized iteratively such that the model FC0 and FC1 best fit their empirical counterparts, as illustrated in Fig. 2C. In practice, the model is calibrated  
280 by the estimated time constants  $\tau_x$  in Fig. 1B, a single value for all ROIs per each subject and condition. This choice is motivated by our previous results for resting-state fMRI where no difference across ROI time constants was observed. An improvement would consist in estimating individual values for each ROI/subject/condition, but this is left for later work. From an initial homo-  
285 geneous diagonal matrix  $\Sigma$  and effective connectivity  $C = 0$ , each optimization step aims to reduce the model error, defined as the matrix distance between the model and empirical FC0, plus the same matrix distance for FC1. The best fit corresponds to the minimum of the model error, which gives the estimated  $C$  and  $\Sigma$  for each subject and condition. In summary, the model inversion explains  
290 the observed spatiotemporal FC by means of  $\Sigma$  and  $C$ .

The precision of the estimated parameters is limited by the number of time points in the BOLD signals, but this procedure unambiguously retrieves the model parameters for accurate empirical FC0 and FC1 observables. The iterative approach provides an advantage compared to multivariate autoregressive  
295 models applied directly to the data: it enhances the robustness of the estimation by reducing the number of estimated parameters (absent connections are

kept equal to 0) and imposing constraints (non-negativity for  $C$  and  $\Sigma$ ). Importantly, the model optimization takes network effects into account: EC weights are tuned together such that their joint update best drives the model toward the empirical FC matrices. It is also worth noting that we only retain information about the existence of connections from DSI; individual DSI values do not influence the corresponding values in  $C$ . In practice, EC directionality depends mainly on the time-shifted covariance FC1. Further details about the model and the optimization procedure are given in Methods.

The qualitative fit of the model is displayed in Fig. 3A (left panel) for FC0 and a single subject at rest. Quantified by the Pearson correlation coefficients between the model and empirical FC matrix elements, the model goodness of fit is summarized in the right panel of Fig. 3A for all subjects and the two conditions, which is very good for almost all cases with plotted values larger than 0.7 [29]. Importantly, we verify that the model captures the change in FC between the two conditions, as illustrated in Fig. 3B: the left panel provides the example for a subject and the right panel the summary for all subjects, as in Fig. 3A. Once again, the Pearson correlation between the model and empirical  $\Delta$ FC (movie minus rest) is larger than 0.6 for most subjects. Moreover, the parametric p-values for the changes in FC0 matrix elements are in good agreement with their empirical counterparts in Fig. 3C, with an overall Pearson correlation coefficient of 0.8 with  $p < 10^{-10}$ . Only elements corresponding to absent EC connections (in black) are not in good agreement; correcting SC with the addition of missing edges could improve this aspect, but this requires individual DSI data instead of the generic SC used here. To further verify the robustness of estimated parameters, we repeat the same estimation procedure using FC0 and FC2 with a time shift of 2 TR instead of FC0 and FC1 (with a 1 TR) as done so far. We found nearly identical  $\Sigma$  estimates and very similar  $C$  estimates (Fig. 3D), which agrees with our previous results for resting-state fMRI data [19].

To finally characterize how the model parameters respectively capture the FC statistics, we compare in Fig. 3E the model error for the four models com-

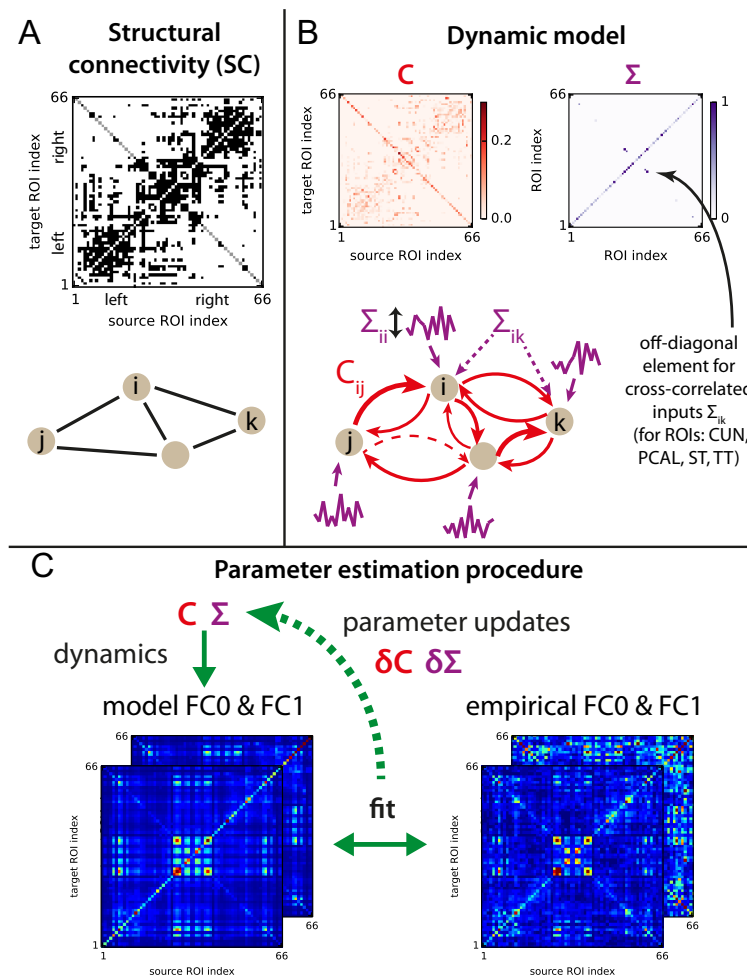

**Figure 2: Noise-diffusion dynamic cortical model.** **A:** DSI measurements provide the skeleton of the intracortical connectivity matrix. We add inter-hemispheric connections (gray pixels on the anti-diagonal) as they are known to be missed by DSI. **B:** The parameters of the model are the recurrent effective connectivity  $C$  and the input covariances  $\Sigma$ . Contrary to SC, EC has directional connections, as represented by the red arrows with various thicknesses for reciprocal connections. Some existing connections may have zero weights (dashed arrow), equivalent to an absence of connections for the network dynamics.  $\Sigma$  comprises variances on the diagonal (one for each ROI) plus 4 pairs of symmetric elements on the anti-diagonal for cross-correlated inputs for CUN, PCAL, ST and TT (cf. Table 1). As a convention, the formatting of all matrices in this paper shows the source and target ROIs on the x-axis and y-axis, respectively. **C:** From known input covariance  $\Sigma$  and effective connectivity  $C$ , the model FC0 and FC $\tau$  matrices are calculated and compared to their empirical counterparts, which in turn gives the updates  $\Delta C$  and  $\Delta \Sigma$  for the model. The optimization is performed until the minimal matrix distance is reached between the model and empirical FC matrices (average of both sets).



binning the model estimates for the two conditions, rest and movie. The model error corresponding to the movie FC is decomposed into three components: the FC0 variances (on the matrix diagonal) and covariances (off-diagonal elements), as well as FC1 elements. The horizontal dotted line indicates the error for the M/M model, with the two estimates from the movie data. When the EC is changed for rest (M/R model), the fit for FC0 variances and covariances become worse, but only dramatically for a few subjects. However, the FC1 fit is worsen for many subjects. In contrast, changing  $\Sigma$  from movie to rest (M/R model) is particularly dramatic for FC0 variances; it also increases the error - compared to M/M - for FC0 covariances and FC1 for all subjects. Last, the R/R model with both rest estimates appears worse for FC1 and equally bad for FC0 elements. This illustrates that  $C$  and  $\Sigma$  are combined in shaping FC, so observed changes in FC requires a proper model inversion to interpret its “causes”, here local variability and network connectivity. In particular, a phenomenological analysis of empirical FC0 is not sufficient to estimate the change in cortical interactions, in the limit of the proposed dynamic model.

### 3.3. *Movie viewing induces greater changes in local variability than network effective connectivity*

From Fig. 3, we conclude that the tuned model satisfactorily captures the changes in empirical FC between rest and movie. Now we examine how the estimated parameters discriminate between the two conditions, to verify whether  $C$  and  $\Sigma$  are useful fingerprints for the cortical dynamics. Fig. 4A displays the global distributions for  $C$  and  $\Sigma$  over all subjects: the Kolmogorov-Smirnov distance between the rest and movie distributions is 0.20 for  $\Sigma$ , to be compared with only 0.04 for  $C$ . At the level of individual parameters, Fig. 4B display the significance (same parametric t-test as in Fig. 1) for the changes in  $C$  (in bright red) and  $\Sigma$  (purple) across conditions: local variability is more affected by movie viewing than EC. The significance for changes in the sum of incoming and outgoing weights is also plotted: it shows that outgoing connections (thin solid dark red curves) exhibit more significant changes than incoming ones (thin

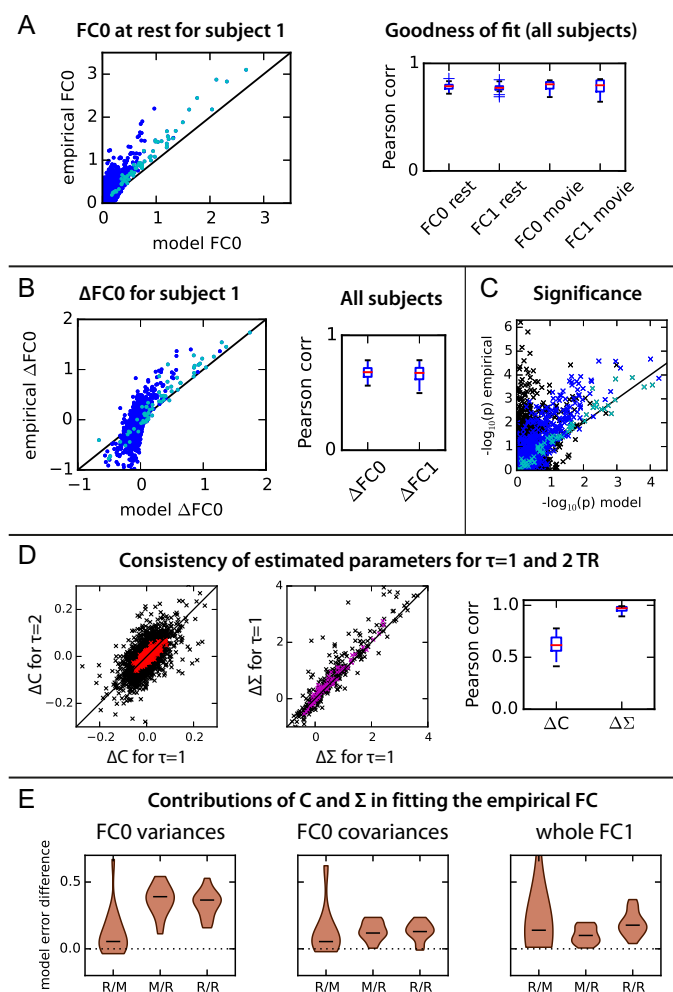

Figure 3: **Goodness of fit of the model.** **A:** The left panel represents the model and empirical FC0 at rest for a single subject; each dot represent a matrix element (variances = diagonal elements in cyan, off-diagonal elements in dark blue). The right panel summarizes the goodness of fit as measured by the Pearson correlation over all subjects for the two conditions. **B:** Same as A for  $\Delta FC0$  and  $\Delta FC1$  (movie minus rest). **C:** Comparison of empirical and model p-values (uncorrected Welch's t-test) for the each matrix element of  $\Delta FC0$ . Cyan crosses indicate variances, blue indicate covariances corresponding to an existing connection in EC and black covariances for absent connections. **D:** Consistency between the  $\Delta C$  and  $\Delta \Sigma$  matrices obtained for each subject using two distinct optimizations, FC0/FC1 with  $\tau = 1$  TR versus FC0/FC2 with  $\tau = 2$  TR. The left and middle panels show the correspondence of matrix elements, with the black diagonal indicating a perfect match. Mean values over all subjects are plotted in colors. The right panel displays the Pearson correlation coefficients - one per subject - between the model estimates. **E:** Comparison of the four models combining the estimated  $C$  and  $\Sigma$  for the two conditions where  $X/Y$  corresponds to  $C_X$  and  $\Sigma_Y$  with  $X$  and  $Y$  being either rest (R) or movie (M). The plotted value is the difference in model error - with respect to the movie empirical FC - between the model indicated on the x-axis and M/M. Here the model error is decomposed according to the three components of FC: diagonal of FC0 (left), off-diagonal elements of FC0 (middle) and whole FC1 matrix (right). The violin plots correspond to the variability over the 19 subjects.

dotted line), as well as connections taken individually. From Fig. 4C, changes in  $\Sigma$  are mainly increases, whereas those for  $C$  are distributed around 0.

360 We now examine in Fig. 4D which connections and ROIs experience the most significant changes in parameters. For  $\Sigma$  (middle panel), the significance limit with  $p < 0.01$  (uncorrected) is displayed in dotted line, while the dashed line corresponds to a Bonferroni correction with family-wise error rate equal to 0.05 (that is,  $p < 0.05/m$  with total number of parameters  $m = N + 4 = 70$  for  $\Sigma$ ). We identify 5 parameters that pass the Bonferroni threshold, which all  
365 concern the bilateral ST and LOCC ROIs (7% of all parameters, in bright red); 4 more ROIs (in darker red) pass the uncorrected threshold (13% in total). In contrast, 4 EC connections pass the Bonferroni threshold (0.3%) and 82 more the uncorrected threshold (7%). These changes concern 55 ROIs among  
370 the 66; moreover, 31 are EC increases (including the 4 passing the Bonferroni threshold) versus 55 decreases. For outgoing weights, only the right LOCC shows a significant increases passing the Bonferroni threshold (2%) and 8 more ROIs are above the uncorrected threshold (12%). This also raises the issue of comparing the significance of EC changes (Bonferroni correction with  $m = 1180$   
375 EC parameters) versus that for  $\Sigma$  ( $m = 70$  parameters, more than one order of magnitude lower). Non-parametric permutation testing points to the same ROIs - with slightly higher significance - but this does not solve the problem of family-wise error control. This motivates a complementary analysis based on network dynamics and graph theory (now with non-parametric significance  
380 testing) to interpret the changes in EC.

### 3.4. Dynamical balance in the integration of visual and auditory inputs

The power of our model-based approach lies in disentangling local from network contributions to the observed changes in FC. LOCC belongs to the visual cortex - albeit not the primary visual cortex - and ST hosts the primary  
385 auditory cortex. Therefore we interpret the increase of local variability for those sensory ROIs as an extrinsic increase of the stimulus load in the movie viewing condition. Interestingly, changes in BOLD variances that also pass the

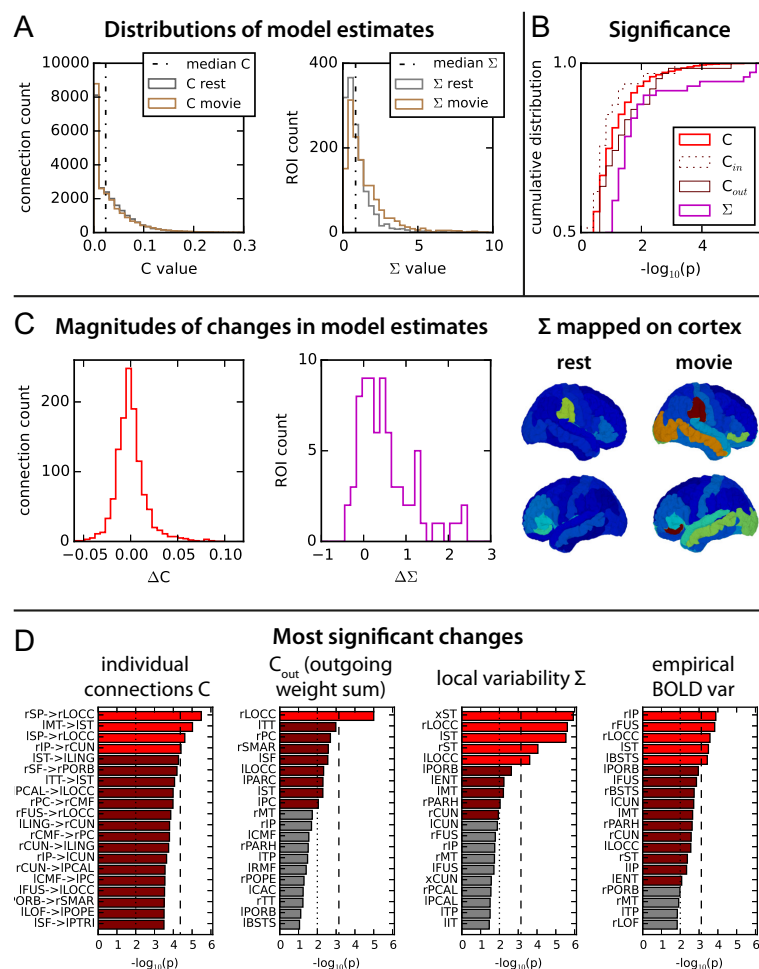

**Figure 4: Changes in the estimated model parameters between rest and movie. A:** Histograms of  $C$  and  $\Sigma$  values in the two conditions. The median for each distribution of the rest condition is indicated by the vertical dashed-dotted line. **B:** Significance of the changes in  $C$  and  $\Sigma$ , as well as the sum of incoming weights in  $C$  ( $C_{in}$ ) and of outgoing weights ( $C_{out}$ ) for each ROI. The curves correspond to the cumulative distribution of  $-\log_{10}(p)$  for the p-value  $p$  obtained from Welch's t-test for unequal variances for the corresponding connection or ROI, as done in Fig. 1 for FC. On the right, the mean input variances  $\Sigma$  over all subjects are mapped on the cortical surface (left and right side views) for the two conditions; hot colors indicate large values. **C:** Histogram of the magnitudes of the changes - movie minus rest -  $\Delta C$  and  $\Delta \Sigma$  for all connections and ROI. The right panel displays the mean  $\Sigma$  over all subjects in each condition mapped on the cortical surface. **D:** Connections with most significant changes in  $C$  and ROIs with significant changes in outgoing weights  $C_{out}$ , local variability  $\Sigma$  and empirical BOLD variances. Two significance thresholds are plotted: the vertical dotted line corresponds to  $p < 0.01$  (uncorrected) and the dashed line  $p < 0.05/m$  with Bonferroni correction ( $m = N$  except for  $\Sigma$  where  $m = N + 4$  for the cross-correlated inputs and  $m = 1180$  for  $C$ ). The corresponding ROIs are plotted in dar red and red, respectively. For  $\Sigma$ , the 4 cross-correlated inputs for visual and auditory ROIs are in the right column indicated by 'x'.

Bonferroni threshold - namely rIP, rFUS and lBSTS - are not straightforwardly explained by a corresponding change in the local variability  $\Sigma$  in Fig. 4D. This suggests that their increase could arise instead from the propagation of activity from other ROIs, as a network effect. In other words, even though changes in local activity between rest and movie are stronger both in magnitude and in significance, they do not explain all changes for FC.

To address this question, we examine the propagation of sensory information from the visual and auditory bilateral ROIs in our parcellation: CUN, PCAL, LOCC and LING on the one hand; ST, TT and MT on the other hand. We also focus on the above-mentioned FUS and BSTS that are known to be involved downstream visual and auditory processing [38, 39]. Fig. 5A shows the SC density between those visual (located in the lower left side and indicated by the red bars), auditory (upper right side in blue) and so-called ‘integration’ ROIs (center in purple). The dark pixels along the diagonal of the SC matrix hints at the hierarchy from visual ROIs (‘VIS’) and auditory ROIs (‘AUD’) to integration ROIs (‘INT’), corresponding to the solid arrows in the diagram on the top. In addition, fewer direct connections between VIS and AUD those on the matrix sides (dotted arrow in the diagram).

The estimated EC weights in Fig. 5B suggest that - for both rest and movie - direct anatomical connections between VIS and AUD are not “used” in practice, but fluctuating activity propagates between VIS and AUD via INT, back and forth. Note that plotted values in Fig. 5B corresponds to z-scores averaged over the subjects and normalized over the distribution for all connections, see Eq. 3 in Methods and Fig. 4A with the median value indicated by the dashed-dotted line. To further quantify this hierarchical propagation, we use the effective drive (ED) that is a canonical measure for the noise-diffusion network used here. As illustrated in the left diagram, it measures the amount of fluctuating activity at ROI  $j$  (standard deviation of BOLD signal  $\sqrt{Q_{jj}^0}$ , where  $Q_{jj}^0$  is the model variance on the diagonal of FC0) that is sent to ROI  $i$  (multiplied by the EC weight  $C_{ij}$ ) and contributes to its activity. Although Fig. 5B shows a picture globally similar for rest and movie, the difference of ED z-scores in

Fig. 5C indicates an increase to FUS from all VIS ROIs, as well as an increase from PCAL and LOCC to LING and LOCC. In addition, LOCC sends stronger activity to PCAL and CUN. In the auditory side, ST increases its effect on TT, MT, BSTS and FUS. Together, most increases are along the diagonal of the hierarchical integration mentioned above and the bridge between VIS and AUD is mainly ensured by LOCC, FUS, BSTS and MT.

Thanks to our model-based approach, we can decompose the change in ED into two components related to the changes in  $C$  and  $\Sigma$  between rest and movie. If we retain only the increase in local variability  $\Sigma$  for the movie condition, ED increases almost everywhere, and in a particularly large amount for direct connections from ST to visual ROIs (left panel); note that visual ROIs also increase their direct effect on ST. However, negative changes in  $C$  nullifies this increase, as shown in the right panel. In addition, increased  $C$  values boost EC along the diagonal. This means that the mixed positive and negative changes in  $C$  select pathways to preserve the hierarchical integration of sensory influx. To check whether this yin-yang effect is significant, we calculate the asymmetry between the left and right matrices in Fig. 5C; in practice, this is given by the scalar product of the vector obtained by stacking the matrix columns, normalized by the total ED changes in absolute value (matrix in center). The asymmetry corresponding to the 18 bilateral ROIs in Fig. 5C is represented by a diamond in Fig. 5D and compared to a surrogate distribution for the same number of randomly chosen ROIs, while preserving the hemispheric symmetry. The significance for the observed asymmetry in the VIS-INT-AUD subnetwork is  $p = 0.04$  and the  $10^4$  surrogate values are distributed around zero, confirming that this yin-yang effect does not come artificially from particular properties of the model, but from the estimated parameters instead.

### 3.5. Path selection in the whole cortical network

Now we analyze the ED changes in a more global manner to measure the effect of integration path selection at the whole-cortex level. Using the Louvain method from graph theory [36, 37], we estimate communities with higher-than-

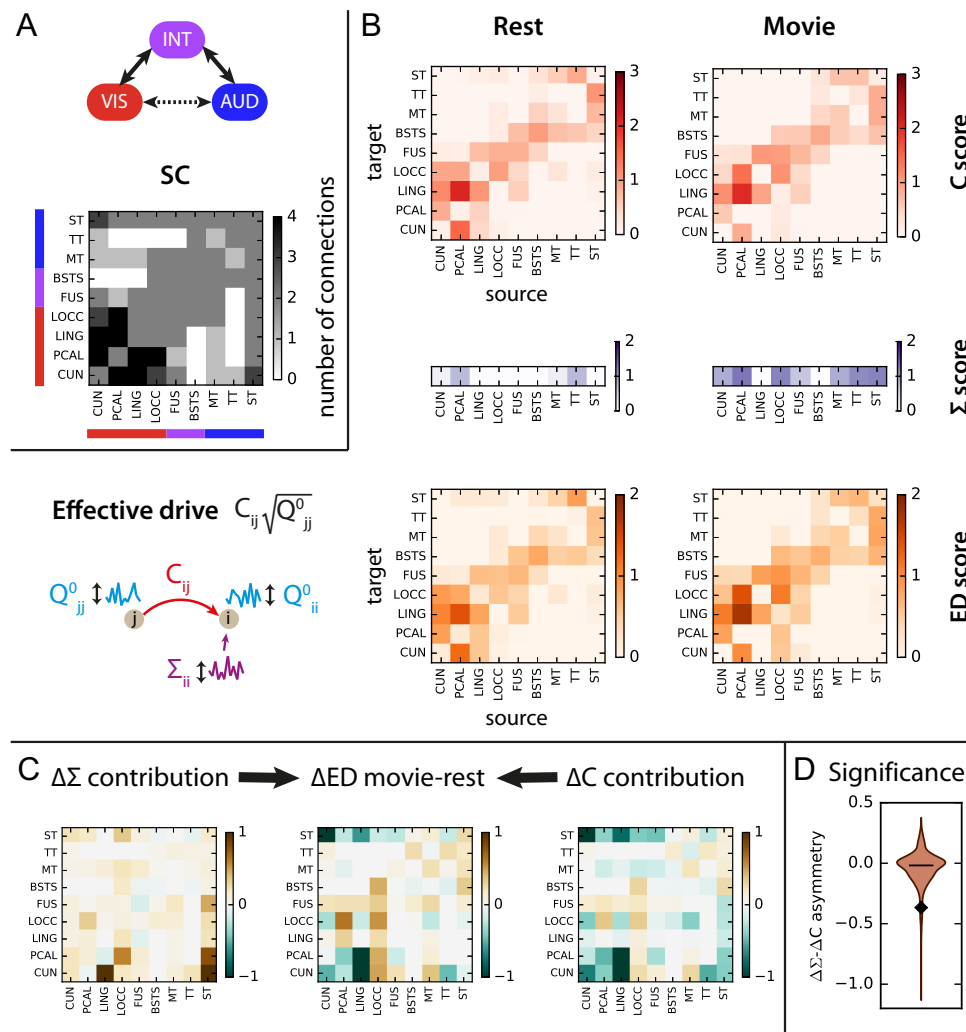

Figure 5: **Changes in activity in the early visual and auditory pathways. A:** Structural connectivity between 14 ROIs in the early visual and auditory pathways, as well as 4 integration ROIs. Connections from the left and right hemispheres are grouped together. **B:** Statistical z-scores for the  $C$ ,  $\Sigma$  and effective drive (ED) in each condition for the ROIs and connections displayed in A. The score measures the proportions of large values over the subjects for each matrix element in the global distribution; see Eq. 3 for a formal definition. On the bottom left, the schematic representation describes the effective drive that quantifies the propagation of fluctuating activity from ROI  $j$  to ROI  $i$ , which contributes to the variance of the ROI activity  $Q_{ii}^0$  in addition to the input variance  $\Sigma_{ii}$ ; see Eq. (4). **C:** Changes in effective drive for ROIs between rest and movie (middle panel), as well as contributions from  $\Delta C$  (right) and  $\Delta\Sigma$  (left). **D:** Comparison of the asymmetry of the contributions from  $\Delta\Sigma$  and  $\Delta C$  for the subnetwork in C (diamond marker) with the asymmetry distribution of similar subnetworks of randomly chosen ROIs in the network (violin plot).

chance exchange of fluctuating activity between them, as measured by ED. We  
 450 perform community analysis for each subject in each condition and pool the  
 results over the subjects to obtain a participation index of ROI pairs, which  
 measures the probability for them to be in the same community. To test the  
 significance of these, we repeat the same procedure  $10^3$  times while mixing the  
 labels (rest and movie) among the subjects to generate surrogate participation  
 455 indices. This gives an individual null distribution of  $10^3$  values per ROI pair;  
 details are provided in Methods.

Fig. 6A displays increases and decreases (dark pixels) of participation indices  
 for all ROI pairs in movie compared to rest. For illustration purpose, the ROIs  
 grouped into 6 groups: somatosensory-motor (SMT), frontal (FRNT) and so-  
 460 called ‘central’ ROIs (CTRL) in addition to the visual, auditory and integration  
 regions examined in Fig. 5; note that the integration group includes more ROIs  
 than before, see the Table 1. Most decreases concern ROIs in the same hemi-  
 sphere (bottom left and top right in the right panel), whereas increases involve  
 interhemispheric ROI pairs (top left and bottom right in the left panel). These  
 465 increases especially concern AUD, INT and FRNT. Last, interactions between  
 VIS and INT strongly increase both within and between hemispheres.

To understand the changes in ED from a feedforward-feedback perspective,  
 Fig. 6B summarizes the percentage of increase and decrease compared to rest  
 between the groups, where the two hemispheres are taken together. The largest  
 470 increases concern VIS and AUD internally, as well as feedforward projections  
 from VIS to INT. Globally, all contributions from VIS, AUD and INT increase,  
 at the noticeable exception of direct interactions between AUD and VIS. Once  
 again, the feedback to VIS and AUD comes from INT. Fig. 6C summarizes the  
 changes: At rest, AUD is strongly tied to the INT, SMT and part of FRNT. This  
 475 cluster is decoupled in the movie condition such that part of INT binds to VIS.  
 Meanwhile, INT remains linked to FRNT, whose interhemispheric interactions  
 are strongly boosted. This underlines a selective coordination of cortical paths  
 to implement a distributed and hierarchical processing of sensory information.



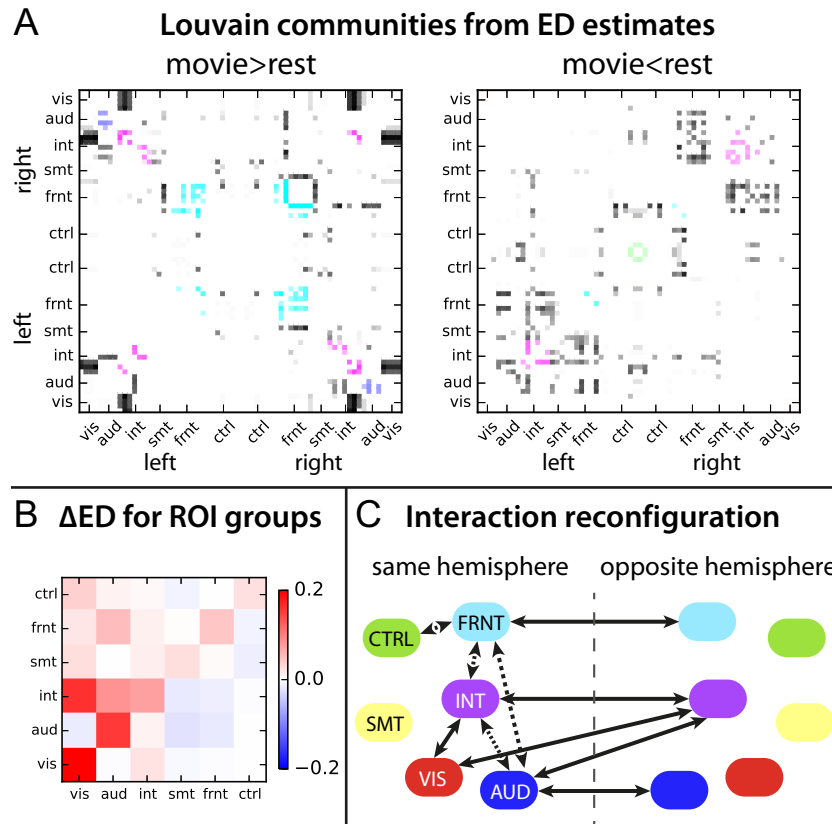

**Figure 6: Path selection and inter-hemispheric integration in the cortex. A:** Changes in index participation in ED-based communities estimated by the Louvain method: increases (left) and decreases (right) in movie as compared to rest. The plotted values correspond to averages over the 19 subjects, for each of which the Louvain method was applied 10 times on the ED matrix. ROIs are ordered separately for the two hemispheres according to the groups in Table 1: red for visual, blue for auditory, purple for integration, yellow for somatosensory-motor cyan for frontal and green for “central”; the pixels for ROIs belonging to the the same group are displayed in color. **B:** Changes in effective drive between ROIs pooled in 6 groups: visual in red, auditory in dark blue, integration in purple, somatosensory-motor in yellow, frontal in cyan and “central” in green. The change is calculated in % of the value for rest. The lists of the group concern ROIs from both hemispheres. **C:** Schematic diagram of increased interactions between ROI groups for movie compared to rest summarizing results in A and B. Arrows in solid line indicate an increase, a dotted line a mixture of decreases and increases.

## 4. Discussion

Our results shed light on a fundamental question in neuroscience: how do inputs and connectivity locally interact to generate large-scale integration of information in the brain? To address this question, we use a recently developed model-based approach to provide an interpretation of task-evoked BOLD activity in terms of cortical communication, by decomposing it into local variability and network effective connectivity. The main finding of this study concerns the reorganization of the cortical connectivity during movie viewing: although changes in EC appear at first sight smaller than those in local variability, they induce strong changes in communication across the cortex.

First, they are involved in a down-regulation of forward connections in a compensatory manner, such that regional inputs do not saturate the network; meanwhile, some specific backward connections are boosted to enable the efficient transmission, such as top-down signals from integration to sensory areas, despite the activity increase of the latter (Fig. 5C). The dynamic balance is expected to be task dependent - in regard of extrinsic stimulus inputs - and result in complex patterns of changes in functional synchronization at the network level (Fig. 1C). Our results are in line with previous studies and suggest a continuum of the balanced-activity principle from the neuronal level [40] to the cortical level [41].

Second, specific pathways are actually selected almost everywhere in the cortex to shape the integration of sensory information. Our results suggest a reorganization of the functional communities in terms of propagation of BOLD activity (Fig. 6A): during the movie condition, homotopic areas increase their information exchange via inter-hemispheric connections - especially parietal and temporal areas related to multimodal integration [42, 39], as well as frontal areas. This illustrates how the cortex becomes specialized when engaging a task, while specific high-level ROIs remains rather more stable and keep listening the whole cortex. Because of the movie-viewing task considered here and its stark difference compared to the rest condition, we observe increases of BOLD

variances, presumably related to the increase in stimulus load and similar to  
510 previous MEG measurements for the same experiment [11]. Carefully designed  
experiments that controlled for the change in stimuli showed instead a decrease  
of variance when a subject engages a visual recognition task, as opposed to  
passive viewing [16]. In line with other studies that point to decreased brain  
interactions during task [43, 44], the reconfiguration compared to the resting  
515 state may consist in shutting down more pathways than opening new ones (cf.  
balanced EC changes in Fig. 4C). This could explain the reduction of global  
cortical activity, once the stimulus-related changes are taken into account.

Beyond the task analyzed here, our study demonstrates that spatiotemporal  
BOLD (co)variances convey important information about the cognitive state  
520 of subjects, as was previously reported [16, 17]. Our spatiotemporal FC corre-  
sponds to transitions of fMRI activity between successive TRs; this statistics is  
averaged over the whole recording period, in contrast to other time-dependent  
measures such as inter-subject correlations [45], metastability [46] or measures  
of dynamic FC averaged over 1-2 minutes, corresponding to periods of more  
525 than 30 TRs [15]. This was already suggested by our previous analysis of rest-  
ing state [19] and is in line with recent results that focused on the temporal  
component of BOLD signals [47, 18]. Moving beyond the analysis of spatial FC,  
namely covariances without time shift (FC0) or BOLD correlations, is thus a  
crucial step toward a better interpretation of fMRI measurements. The proposed  
530 model uses an exponential approximation of BOLD autocovariance (locally over  
a few TRs) and discards slow-frequency variations. In contrast, previous studies  
highlighted that, when considering a broader spectrum with slow frequencies,  
BOLD time series have long-range temporal interactions [48, 16, 49]. This mul-  
tifractal property of BOLD signals has been analyzed to describe undirected  
535 interactions between ROIs [17]; it would be interesting to compare them to the  
directed effective connectivity estimated here, which is left for future work.

Following resting-state studies [6, 7, 8, 9], the focus on second-order BOLD  
statistics allows for stepping from a structure-centric [50] to a network-oriented  
analysis. The input noise in  $\Sigma$  play a functional role in our model, which we

540 interpret as spontaneous activity. The comparison of  $\Sigma$  across conditions allows  
for a quantification of intrinsic and extrinsic local activity for each ROI [13, 14].  
Taking the intrinsic noisy nature of brain circuits [51, 52, 53] properly into  
account in models is a challenge. Therefore, it has been done for models with  
complex local dynamics such as dynamic causal model (DCM) only for small  
545 number of ROIs initially [54], even though recent efforts aim to extend it to the  
whole brain. Here the proposed modeling makes use of the putative diffusion  
of this noisy activity in the cortical network via the long-range projections to  
tune the model and interpret the model estimates. In a way, it extends analyses  
based on partial correlations that measure undirected interactions [44]. Unlike  
550 dynamic causal modeling (DCM), we do not model self connectivity within  
ROIs, but directly estimate the amplitude of random fluctuations within each  
region and how it is transferred via the effective drive (Fig. 5).

Although it does not focus on the mechanisms underlying the dynamic reg-  
ulation of EC [55, 54], our model provides a fingerprint of the brain dynamics  
555 that we expect to be discriminative between tasks and behavioral conditions, as  
shown here for passive vision and audition. We stress the importance of con-  
sidering the whole cortex - or better the whole brain with subcortical regions  
- to generate the estimated fingerprint: changes across conditions reported in  
Fig. 6 concerns many areas distributed all over the brain. At this level,  $C$  and  
560  $\Sigma$  lie in a high dimensional space (one per connection and about one per node,  
respectively), so statistical analysis of the estimated parameters across condi-  
tions may suffer from an approach based on family-wise error correction (e.g.,  
Bonferroni). Graph theory is then a useful complement, as was done here using  
community analysis.

## 565 Acknowledgements

This work was supported by the Human Brain Project (grant FP7-FET-  
ICT-604102 and H2020-720270 HBP SGA1 to MG and GD) and the Marie  
Sklodowska-Curie Action (grant H2020-MSCA-656547 to MG). This work was

partly supported by the 7th Framework Programme of the European Commis-  
 570 sion (grant PCIG12-334039 to DM) and the KU Leuven Special Research Fund  
 (grant C16/15/070 to DM). VB was supported by a Post-Doctoral Fellowship  
 grant from the University of Chieti.

## References

- [1] D. C. Van Essen, C. H. Anderson, D. J. Felleman, Information processing  
 575 in the primate visual system: an integrated systems perspective, *Science*  
 255 (1992) 419–423.
- [2] B. Biswal, F. Yetkin, V. Haughton, J. Hyde, Functional connectivity in the  
 motor cortex of resting human brain using echo-planar mri, *Magn Reson*  
*Med* 34 (1995) 537–541.
- [3] R. Cabeza, L. Nyberg, Imaging cognition ii: An empirical review of 275  
 580 pet and fmri studies, *J Cogn Neurosci* 12 (2000) 1–47.
- [4] A. K. Engel, P. Fries, W. Singer, Dynamic predictions: oscillations and  
 synchrony in top-down processing, *Nat Rev Neurosci* 2 (2001) 704–716.
- [5] P. Fries, A mechanism for cognitive dynamics: neuronal communication  
 585 through neuronal coherence, *Trends Cogn Sci* 9 (2005) 474–480.
- [6] M. D. Greicius, B. Krasnow, A. L. Reiss, V. Menon, Functional connectivity  
 in the resting brain: a network analysis of the default mode hypothesis,  
*Proc Natl Acad Sci U S A* 100 (2003) 253–258.
- [7] M. Fox, M. Raichle, Spontaneous fluctuations in brain activity observed  
 590 with functional magnetic resonance imaging, *Nat Rev Neurosci* 8 (2007)  
 700–711.
- [8] M. J. Brookes, M. Woolrich, H. Luckhoo, D. Price, J. R. Hale, M. C.  
 Stephenson, G. R. Barnes, S. M. Smith, P. G. Morris, Investigating the elec-  
 trophysiological basis of resting state networks using magnetoencephalog-  
 595 raphy, *Proc Natl Acad Sci U S A* 108 (40) (2011) 16783–16788.

- [9] F. de Pasquale, S. Della Penna, O. Sporns, G. L. Romani, M. Corbetta, A dynamic core network and global efficiency in the resting human brain, *Cereb Cortex* 26 (2016) 4015–4033.
- [10] J. F. Hipp, A. K. Engel, M. Siegel, Oscillatory synchronization in large-  
600 scale cortical networks predicts perception, *Neuron* 69 (2011) 387–396.
- [11] V. Betti, S. Della Penna, F. de Pasquale, D. Mantini, L. Marzetti, G. L. Romani, M. Corbetta, Natural scenes viewing alters the dynamics of functional connectivity in the human brain, *Neuron* 79 (2013) 782–797.
- [12] S. Spadone, S. Della Penna, C. Sestieri, V. Betti, A. Tosoni, M. G. Perrucci,  
605 G. L. Romani, M. Corbetta, Dynamic reorganization of human resting-state networks during visuospatial attention, *Proc Natl Acad Sci U S A* 112 (2015) 8112–8117.
- [13] M. Mennes, C. Kelly, S. Colcombe, F. X. Castellanos, M. P. Milham, The  
610 extrinsic and intrinsic functional architectures of the human brain are not equivalent, *Cereb Cortex* 23 (2013) 223–229.
- [14] M. W. Cole, D. S. Bassett, J. D. Power, T. S. Braver, S. E. Petersen, Intrinsic and task-evoked network architectures of the human brain, *Neuron* 83 (2014) 238–251.
- [15] R. M. Hutchison, T. Womelsdorf, E. A. Allen, P. A. Bandettini, V. D. Calhoun, M. Corbetta, S. Della Penna, J. H. Duyn, G. H. Glover, J. Gonzalez-Castillo, D. A. Handwerker, S. Keilholz, V. Kiviniemi, D. A. Leopold,  
615 F. de Pasquale, O. Sporns, M. Walter, C. Chang, Dynamic functional connectivity: promise, issues, and interpretations, *Neuroimage* 80 (2013) 360–378.
- [16] B. J. He, Scale-free properties of the functional magnetic resonance imaging  
620 signal during rest and task, *J Neurosci* 31 (2011) 13786–13795.

- [17] P. Ciuciu, P. Abry, B. J. He, Interplay between functional connectivity and scale-free dynamics in intrinsic fmri networks, *Neuroimage* 95 (2014) 248–263.
- 625 [18] A. Mitra, A. Z. Snyder, E. Tagliazucchi, H. Laufs, M. Raichle, Propagated infra-slow intrinsic brain activity reorganizes across wake and slow wave sleep, *Elife* 4.
- [19] M. Gilson, R. Moreno-Bote, A. Ponce-Alvarez, P. Ritter, G. Deco, Estimation of directed effective connectivity from fmri functional connectivity hints at asymmetries of cortical connectome, *PLoS Comput Biol* 12 (2016) e1004762.
- 630 [20] K. Stephan, L. Harrison, W. Penny, K. Friston, Biophysical models of fmri responses, *Curr Opin Neurol* 14 (2004) 629–635.
- [21] A. McIntosh, F. Gonzalez-Lima, Structural equation modeling and its application to network analysis in functional brain imaging, *Human Brain Mapping* 2 (1994) 2–22.
- 635 [22] K. Friston, Beyond phrenology: what can neuroimaging tell us about distributed circuitry?, *Annu Rev Neurosci* 25 (2002) 221–250.
- [23] C. J. Honey, R. Kötter, M. Breakspear, O. Sporns, Network structure of cerebral cortex shapes functional connectivity on multiple time scales, *Proc Natl Acad Sci U S A* 104 (2007) 10240–10245.
- 640 [24] K. J. Friston, R. J. Dolan, Computational and dynamic models in neuroimaging, *Neuroimage* 52 (2010) 752–765.
- [25] K. J. Friston, L. Harrison, W. Penny, Dynamic causal modelling, *Neuroimage* 19 (2003) 1273–1302.
- 645 [26] A. M. Aertsen, G. L. Gerstein, M. K. Habib, G. Palm, Dynamics of neuronal firing correlation: modulation of "effective connectivity", *J Neurophysiol* 61 (1989) 900–917.

- [27] J. Cabral, E. Hugues, O. Sporns, G. Deco, Role of local network oscillations  
650 in resting-state functional connectivity, *Neuroimage* 57 (2011) 130–139.
- [28] G. Deco, A. Ponce-Alvarez, D. Mantini, G. Romani, P. Hagmann, M. Cor-  
betta, Resting-state functional connectivity emerges from structurally and  
dynamically shaped slow linear fluctuations, *J Neurosci* 33 (2013) 11239–  
11252.
- [29] A. Messé, D. Rudrauf, H. Benali, G. Marrelec, Relating structure and  
655 function in the human brain: relative contributions of anatomy, stationary  
dynamics, and non-stationarities, *PLoS Comput Biol* 10 (2014) e1003530.
- [30] J. Hlinka, M. Palus, M. Vejmelka, D. Mantini, M. Corbetta, Functional con-  
nectivity in resting-state fmri: is linear correlation sufficient?, *Neuroimage*  
660 54 (2011) 2218–2225.
- [31] D. Mantini, U. Hasson, V. Betti, M. G. Perrucci, G. L. Romani, M. Cor-  
betta, G. A. Orban, W. Vanduffel, Interspecies activity correlations reveal  
functional correspondence between monkey and human brain areas, *Nat*  
*Methods* 9 (2012) 277–282.
- [32] J. D. Power, K. A. Barnes, A. Z. Snyder, B. L. Schlaggar, S. E. Petersen,  
665 Spurious but systematic correlations in functional connectivity mri net-  
works arise from subject motion, *Neuroimage* 59 (2012) 2142–2154.
- [33] J. Sui, T. Adali, G. D. Pearlson, V. D. Calhoun, An ica-based method for  
the identification of optimal fmri features and components using combined  
670 group-discriminative techniques, *Neuroimage* 46 (2009) 73–86.
- [34] P. Hagmann, L. Cammoun, X. Gigandet, R. Meuli, C. J. Honey, V. J.  
Wedeen, O. Sporns, Mapping the structural core of human cerebral cortex,  
*PLoS Biol* 6 (2008) e159.
- [35] V. Arsigny, P. Fillard, X. Pennec, N. Ayache, Log-euclidean metrics for  
675 fast and simple calculus on diffusion tensors, *Magn Reson Med* 56 (2006)  
411–421.



- [36] M. E. J. Newman, Modularity and community structure in networks, *Proc Natl Acad Sci U S A* 103 (2006) 8577–8582.
- [37] V. Blondel, J.-L. Guillaume, R. Lambiotte, E. Lefebvre, Fast unfolding of  
680 communities in large networks, *J Stat Mech* 10 (2008) P10008.
- [38] J. J. DiCarlo, D. Zoccolan, N. C. Rust, How does the brain solve visual  
object recognition?, *Neuron* 73 (2012) 415–434.
- [39] T. M. Talavage, J. Gonzalez-Castillo, S. K. Scott, Auditory neuroimaging  
with fmri and pet, *Hear Res* 307 (2014) 4–15.
- 685 [40] N. Dehghani, A. Peyrache, B. Telenczuk, M. Le Van Quyen, E. Halgren,  
S. S. Cash, N. G. Hatsopoulos, A. Destexhe, Dynamic balance of excitation  
and inhibition in human and monkey neocortex, *Sci Rep* 6 (2016) 23176.
- [41] G. Deco, M. Corbetta, The dynamical balance of the brain at rest, *Neuro-  
scientist* 17 (2011) 107–123.
- 690 [42] D. Heeger, D. Ress, What does fmri tell us about neuronal activity?, *Nat  
Rev Neurosci* 3 (2002) 142–151.
- [43] R. W. Emerson, S. J. Short, W. Lin, J. H. Gilmore, W. Gao, Network-level  
connectivity dynamics of movie watching in 6-year-old children, *Front Hum  
Neurosci* 9 (2015) 631.
- 695 [44] W. Gao, H. Zhu, K. Giovanello, W. Lin, Multivariate network-level ap-  
proach to detect interactions between large-scale functional systems, *Med  
Image Comput Comput Assist Interv* 13 (2010) 298–305.
- [45] U. Hasson, Y. Nir, I. Levy, G. Fuhrmann, R. Malach, Intersubject syn-  
chronization of cortical activity during natural vision, *Science* 303 (2004)  
700 1634–1640.
- [46] G. Deco, V. Jirsa, A. McIntosh, Emerging concepts for the dynamical orga-  
nization of resting-state activity in the brain, *Nat Rev Neurosci* 12 (2011)  
43–56.

- [47] A. Mitra, A. Snyder, C. Hacker, M. Raichle, Lag structure in resting-state  
705 fmri, *J Neurophysiol* 111 (2014) 2374–2391.
- [48] A.-M. Wink, E. Bullmore, A. Barnes, F. Bernard, J. Suckling, Monofractal  
and multifractal dynamics of low frequency endogenous brain oscillations  
in functional mri, *Hum Brain Mapp* 29 (2008) 791–801.
- [49] P. Ciuciu, G. Varoquaux, P. Abry, S. Sadaghiani, A. Kleinschmidt, Scale-  
710 free and multifractal time dynamics of fmri signals during rest and task,  
*Front Physiol* 3 (2012) 186.
- [50] D. Cordes, V. M. Haughton, K. Arfanakis, G. J. Wendt, P. A. Turski,  
C. H. Moritz, M. A. Quigley, M. E. Meyerand, Mapping functionally related  
regions of brain with functional connectivity mr imaging, *Am J Neuroradiol*  
715 21 (2000) 1636–1644.
- [51] R. B. Stein, E. R. Gossen, K. E. Jones, Neuronal variability: noise or part  
of the signal?, *Nat Rev Neurosci* 6 (2005) 389–397.
- [52] A. A. Faisal, L. P. J. Selen, D. M. Wolpert, Noise in the nervous system,  
*Nat Rev Neurosci* 9 (2008) 292–303.
- [53] I. Dinstein, D. J. Heeger, M. Behrmann, Neural variability: friend or foe?,  
720 *Trends Cogn Sci* 19 (2015) 322–328.
- [54] J. Daunizeau, K. Stephan, K. Friston, Stochastic dynamic causal modelling  
of fmri data: should we care about neural noise?, *Neuroimage* 62 (2012)  
464–481.
- [55] D. Battaglia, A. Witt, F. Wolf, T. Geisel, Dynamic effective connectivity  
725 of inter-areal brain circuits, *PLoS Comput Biol* 8 (2012) e1002438.
